# Supplementary material for: Clinical Efficacy of Ruxolitinib in Patients with Myelofibrosis: A Nationwide Population-Based Study in Korea
Source: MDPI journal article supplement (doi:10.3390/jcm10204774), 2021-10-18
Supplement: s1 [file s1]

**Table S1.** Stratified Cox regression analysis for occurrence of leukemia.

| Unmatched      |          |               |      |           |          | Propensity Score Matched |          |               |      |           |          |                          |
|----------------|----------|---------------|------|-----------|----------|--------------------------|----------|---------------|------|-----------|----------|--------------------------|
|                | <i>n</i> | No. of Events | HR   | 95% CI    | <i>p</i> | <i>p</i> for Interaction | <i>n</i> | No. of Events | HR   | 95% CI    | <i>p</i> | <i>p</i> for Interaction |
| Overall        |          |               |      |           |          |                          |          |               |      |           |          |                          |
| No ruxolitinib | 507      | 61            | 0.83 | 0.55–1.26 | 0.384    |                          | 224      | 25            | 0.78 | 0.48–1.28 | 0.331    |                          |
| Ruxolitinib    | 224      | 36            | 1.00 |           |          |                          | 224      | 36            | 1.00 |           |          |                          |
|                |          |               |      |           |          | 0.444                    |          |               |      |           |          | 0.231                    |
| Primary MF     |          |               |      |           |          |                          |          |               |      |           |          |                          |
| No ruxolitinib | 291      | 38            | 0.70 | 0.41–1.19 | 0.182    |                          | 113      | 11            | 0.59 | 0.29–1.15 | 0.121    |                          |
| Ruxolitinib    | 100      | 21            | 1.00 |           |          |                          | 100      | 21            | 1.00 |           |          |                          |
| Secondary MF   |          |               |      |           |          |                          |          |               |      |           |          |                          |
| No ruxolitinib | 216      | 23            | 0.97 | 0.50–1.85 | 0.916    |                          | 111      | 14            | 1.08 | 0.52–2.22 | 0.845    |                          |
| Ruxolitinib    | 124      | 15            | 1.00 |           |          |                          | 124      | 15            | 1.00 |           |          |                          |

CI, confidence interval; HR, hazard ratio; MF, myelofibrosis; OS, overall survival.

**Table S2.** Stratified Cox regression analysis for thrombotic complications.

| Unmatched      |          |               |      |           |          | Propensity Score Matched |          |               |      |           |          |                          |
|----------------|----------|---------------|------|-----------|----------|--------------------------|----------|---------------|------|-----------|----------|--------------------------|
|                | <i>n</i> | No. of Events | HR   | 95% CI    | <i>p</i> | <i>p</i> for Interaction | <i>n</i> | No. of Events | HR   | 95% CI    | <i>p</i> | <i>p</i> for Interaction |
| Overall        |          |               |      |           |          |                          |          |               |      |           |          |                          |
| No ruxolitinib | 507      | 35            | 0.95 | 0.54–1.69 | 0.866    | 0.500                    | 224      | 15            | 0.94 | 0.48–1.85 | 0.867    | 0.499                    |
| Ruxolitinib    | 224      | 18            | 1.00 |           |          |                          | 224      | 18            | 1.00 |           |          |                          |
| Primary MF     |          |               |      |           |          |                          |          |               |      |           |          |                          |
| No ruxolitinib | 291      | 17            | 0.79 | 0.35–1.76 | 0.564    |                          | 113      | 9             | 1.18 | 0.47–2.94 | 0.721    |                          |
| Ruxolitinib    | 100      | 9             | 1.00 |           |          |                          | 100      | 9             | 1.00 |           |          |                          |
| Secondary MF   |          |               |      |           |          |                          |          |               |      |           |          |                          |
| No ruxolitinib | 216      | 18            | 1.17 | 0.52–2.63 | 0.706    |                          | 111      | 6             | 0.72 | 0.25–2.08 | 0.551    |                          |
| Ruxolitinib    | 124      | 9             | 1.00 |           |          |                          | 124      | 9             | 1.00 |           |          |                          |

CI, confidence interval; HR, hazard ratio; MF, myelofibrosis; OS, overall survival.
